# Supplementary material for: Therapeutic Silencing of Centromere Protein X Ameliorates Hyperglycemia in Zebrafish and Mouse Models of Type 2 Diabetes Mellitus
Source: Front Genet. 2019 Jul 29;10:693. doi: 10.3389/fgene.2019.00693 (PMC6681619; doi:10.3389/fgene.2019.00693)
Supplement: Supplementary file 2 [file Table_2.xlsx]

## Sheet: Sheet1
Supplementary Table S1. Informations for primer, MO, sgRNA and siRNA sequences.
Zebrafish Experiment
qPCR
Name	Forward primer (5'-3')	Reverse primer (5'-3')
cenpx	CCATTCAGCACACGAAGAAGC	TGAAAGAGCGACTCAACAGCT
18s	GCCTGCGGCTTAATTTGACT	ACCACCCACAGAATCGAGAAA
vivo-morpholino
cenpx	GTCGCCATTCTGTCAGGTTGTCGTC
hmox1	TGGAGTCCATCTTTGTGCTGTAGAT
standard MO	CCTCTTACCTCAGTTACAATTTATA
in vitro sgRNA synthesis
sgRNA1 (cenpx)	GGAATTAATACGACTCACTATAGGATGCTGTCGTCCTCGTGGGTTTAAGAGCTATGCTGG
sgRNA2 (cenpx)	GGAATTAATACGACTCACTATAGGTCAAACAGGCCAGCAGCGGTTTAAGAGCTATGCTGG
sgRNA3 (cenpx)	GGAATTAATACGACTCACTATAGGTGAGTCGCTCTTTCAGAGGTTTAAGAGCTATGCTGG
sgRNA scaffold	AAAGCACCGACTCGGTGCCACTTTTTCAAGTTGATAACGGACTAGCCTTATTTAAACTTGCTATGCTGTTTCCAGCATAGCTCTTAAAC
Locus-specific primers for HMA analysis
Name	Forward primer (5'-3')	Reverse primer (5'-3')
For cenpx sgRNA1	GATCTCCACATTCAGCTGTAACC	CAGGATCTTTTCAAAGTGCTCA
For cenpx sgRNA2	CAGTAGTGATGCTGTCGTCCTC	CTCAAGCAGAAACAGATGAAGC
For cenpx sgRNA3	TGAAGTGGCGTTTAAAAAGGTT	CAAAACAATAACAATCgtgcgt
Mouse Experiment
siRNA Oligonuleotide
Name	Sence (5'-3')	Antisence (5'-3')
Cenpx siRNA1	GCAGCCUUGCAUUAUAAAUdTdT	AUUUAUAAUGCAAGGCUGCdTdT
Cenpx siRNA2	CACUUCAGGGAUUGCAAGAdTdT	UCUUGCAAUCCCUGAAGUGdTdT
Cenpx siRNA3	AGACUACUCCAUUUGCACUdTdT	AGUGCAAAUGGAGUAGUCUdTdT
Scrambled siRNA	GGUCAACUACGCAAGUGAUdTdT	AUCACUUGCGUAGUUGACCdTdT
Hmox1 siRNA	AAGCCACACAGCACUAUGUAAdTdT	UUACAUAGUGCUGUGUGGCUUdTdT
qPCR
Name	Forward primer (5'-3')	Reverse primer (5'-3')
Cenpx	TGGAGGGAAACAGTGGCTTC	GGACAGCAGCCTCTAGTACG
Hmox1	GCCGAGAATGCTGAGTTCATG	TGGTACAAGGAAGCCATCACC
Hprt	ATACAGGCCAGACTTTGTTGG	CAACTTGCGCTCATCTTAGG
