# Supplementary material for: Therapeutic Silencing of Centromere Protein X Ameliorates Hyperglycemia in Zebrafish and Mouse Models of Type 2 Diabetes Mellitus
Source: Front Genet. 2019 Jul 29;10:693. doi: 10.3389/fgene.2019.00693 (PMC6681619; doi:10.3389/fgene.2019.00693)
Supplement: Supplementary file 3 [file Table_3.xlsx]

## Sheet: Sheet1
Supplementary Table S2, Genes including in Mouse Insulin Signaling Pathway PCR Array.
Symbol	Description	Unigene	Refseq
Acaca	Acetyl-Coenzyme A carboxylase alpha	Mm.31374	NM_133360
Acox1	Acyl-Coenzyme A oxidase 1, palmitoyl	Mm.356689	NM_015729
Adra1d	Adrenergic receptor, alpha 1d	Mm.389380	NM_013460
Aebp1	AE binding protein 1	Mm.3317	NM_009636
Akt1	Thymoma viral proto-oncogene 1	Mm.6645	NM_009652
Akt2	Thymoma viral proto-oncogene 2	Mm.177194	NM_007434
Akt3	Thymoma viral proto-oncogene 3	Mm.235194	NM_011785
Araf	V-raf murine sarcoma 3611 viral oncogene homolog	Mm.220946	NM_009703
Bcl2l1	Bcl2-like 1	Mm.238213	NM_009743
Braf	Braf transforming gene	Mm.245513	NM_139294
Cap1	CAP, adenylate cyclase-associated protein 1 (yeast)	Mm.8687	NM_007598
Cbl	Casitas B-lineage lymphoma	Mm.266871	NM_007619
Cebpa	CCAAT/enhancer binding protein (C/EBP), alpha	Mm.349667	NM_007678
Cebpb	CCAAT/enhancer binding protein (C/EBP), beta	Mm.439656	NM_009883
Cfd	Complement factor D (adipsin)	Mm.4407	NM_013459
Dok1	Docking protein 1	Mm.156	NM_010070
Dok2	Docking protein 2	Mm.243323	NM_010071
Dok3	Docking protein 3	Mm.33910	NM_013739
Dusp14	Dual specificity phosphatase 14	Mm.240885	NM_019819
Eif2b1	Eukaryotic translation initiation factor 2B, subunit 1 (alpha)	Mm.28839	NM_145371
Eif4ebp1	Eukaryotic translation initiation factor 4E binding protein 1	Mm.6700	NM_007918
Ercc1	Excision repair cross-complementing rodent repair deficiency, complementation group 1	Mm.280913	NM_007948
Fbp1	Fructose bisphosphatase 1	Mm.423078	NM_019395
Fos	FBJ osteosarcoma oncogene	Mm.246513	NM_010234
Frs2	Fibroblast growth factor receptor substrate 2	Mm.135965	NM_177798
Frs3	Fibroblast growth factor receptor substrate 3	Mm.392206	NM_144939
G6pc	Glucose-6-phosphatase, catalytic	Mm.18064	NM_008061
G6pc2	Glucose-6-phosphatase, catalytic, 2	Mm.140768	NM_021331
Gab1	Growth factor receptor bound protein 2-associated protein 1	Mm.277409	NM_021356
Gck	Glucokinase	Mm.220358	NM_010292
Gpd1	Glycerol-3-phosphate dehydrogenase 1 (soluble)	Mm.252391	NM_010271
Grb10	Growth factor receptor bound protein 10	Mm.273117	NM_010345
Grb2	Growth factor receptor bound protein 2	Mm.439649	NM_008163
Gsk3b	Glycogen synthase kinase 3 beta	Mm.394930	NM_019827
Hk2	Hexokinase 2	Mm.255848	NM_013820
Hras	Harvey rat sarcoma virus oncogene 1	Mm.334313	NM_008284
Igf1r	Insulin-like growth factor I receptor	Mm.275742	NM_010513
Igf2	Insulin-like growth factor 2	Mm.3862	NM_010514
Igfbp1	Insulin-like growth factor binding protein 1	Mm.21300	NM_008341
Ins1	Insulin I	Mm.46269	NM_008386
Insl3	Insulin-like 3	Mm.476857	NM_013564
Irs1	Insulin receptor substrate 1	Mm.4952	NM_010570
Irs2	Insulin receptor substrate 2	Mm.407207	NM_001081212
Jun	Jun oncogene	Mm.275071	NM_010591
Klf10	Kruppel-like factor 10	Mm.4292	NM_013692
Kras	V-Ki-ras2 Kirsten rat sarcoma viral oncogene homolog	Mm.383182	NM_021284
Ldlr	Low density lipoprotein receptor	Mm.3213	NM_010700
Lep	Leptin	Mm.277072	NM_008493
Map2k1	Mitogen-activated protein kinase kinase 1	Mm.248907	NM_008927
Mapk1	Mitogen-activated protein kinase 1	Mm.196581	NM_011949
Mtor	Mechanistic target of rapamycin (serine/threonine kinase)	Mm.21158	NM_020009
Nck1	Non-catalytic region of tyrosine kinase adaptor protein 1	Mm.181485	NM_010878
Nos2	Nitric oxide synthase 2, inducible	Mm.2893	NM_001313921
Npy	Neuropeptide Y	Mm.154796	NM_023456
Pck2	Phosphoenolpyruvate carboxykinase 2 (mitochondrial)	Mm.29856	NM_028994
Pdpk1	3-phosphoinositide dependent protein kinase 1	Mm.10504	NM_011062
Pik3ca	Phosphatidylinositol 3-kinase, catalytic, alpha polypeptide	Mm.260521	NM_008839
Pik3cb	Phosphatidylinositol 3-kinase, catalytic, beta polypeptide	Mm.213128	NM_029094
Pik3r1	Phosphatidylinositol 3-kinase, regulatory subunit, polypeptide 1 (p85 alpha)	Mm.259333	NM_001024955
Pik3r2	Phosphatidylinositol 3-kinase, regulatory subunit, polypeptide 2 (p85 beta)	Mm.12945	NM_008841
Pklr	Pyruvate kinase liver and red blood cell	Mm.383180	NM_013631
Pparg	Peroxisome proliferator activated receptor gamma	Mm.3020	NM_011146
Ppp1ca	Protein phosphatase 1, catalytic subunit, alpha isoform	Mm.1970	NM_031868
Prkcg	Protein kinase C, gamma	Mm.7980	NM_011102
Prkci	Protein kinase C, iota	Mm.291554	NM_008857
Prkcz	Protein kinase C, zeta	Mm.28561	NM_008860
Prl	Prolactin	Mm.1270	NM_011164
Ptpn1	Protein tyrosine phosphatase, non-receptor type 1	Mm.277916	NM_011201
Ptprf	Protein tyrosine phosphatase, receptor type, F	Mm.29855	NM_011213
Raf1	V-raf-leukemia viral oncogene 1	Mm.184163	NM_029780
Retn	Resistin	Mm.1181	NM_022984
Rps6ka1	Ribosomal protein S6 kinase polypeptide 1	Mm.301827	NM_009097
Rras	Harvey rat sarcoma oncogene, subgroup R	Mm.389894	NM_009101
Rras2	Related RAS viral (r-ras) oncogene homolog 2	Mm.276572	NM_025846
Serpine1	Serine (or cysteine) peptidase inhibitor, clade E, member 1	Mm.250422	NM_008871
Shc1	Src homology 2 domain-containing transforming protein C1	Mm.86595	NM_011368
Slc27a4	Solute carrier family 27 (fatty acid transporter), member 4	Mm.330113	NM_011989
Slc2a1	Solute carrier family 2 (facilitated glucose transporter), member 1	Mm.21002	NM_011400
Sorbs1	Sorbin and SH3 domain containing 1	Mm.210815	NM_009166
Sos1	Son of sevenless homolog 1 (Drosophila)	Mm.360004	NM_009231
Srebf1	Sterol regulatory element binding transcription factor 1	Mm.278701	NM_011480
Tg	Thyroglobulin	Mm.441333	NM_009375
Ucp1	Uncoupling protein 1 (mitochondrial, proton carrier)	Mm.4177	NM_009463
Vegfa	Vascular endothelial growth factor A	Mm.282184	NM_009505
Actb	Actin, beta	Mm.328431	NM_007393
B2m	Beta-2 microglobulin	Mm.163	NM_009735
Gapdh	Glyceraldehyde-3-phosphate dehydrogenase	Mm.309092	NM_008084
Gusb	Glucuronidase, beta	Mm.3317	NM_010368
Hsp90ab1	Heat shock protein 90 alpha (cytosolic), class B member 1	Mm.2180	NM_008302
